# Supplementary material
Source: publisher site journal article supplement (https://www.spandidos-publications.com/5585/downloadSupplementary)
Supplement: Supplementary file 1 [file downloadSupplementary]

**Table SI.** Antibodies used in the present study.

| Type               | Antibody                        | Manufacturer                               | Cat. no   | Dilution used for western blotting |
|--------------------|---------------------------------|--------------------------------------------|-----------|------------------------------------|
| Primary antibody   | NFATc1                          | Cell Signaling Technology, Inc.            | 8032      | 1:1,000                            |
|                    | $\alpha$ -tubulin               | Cell Signaling Technology, Inc.            | 2144      | 1:5,000                            |
|                    | CtsK                            | Santa Cruz Biotechnology, Inc.             | sc-48453  | 1:1,000                            |
|                    | SEMA3A                          | Santa Cruz Biotechnology, Inc.             | sc-74554  | 1:1,000                            |
|                    | LGR4                            | Santa Cruz Biotechnology, Inc.             | sc-390630 | 1:1,000                            |
|                    | TSG101                          | Santa Cruz Biotechnology, Inc.             | sc-74554  | 1:1,000                            |
|                    | phospho-GSK-3 $\beta$           | Santa Cruz Biotechnology, Inc.             | sc-373800 | 1:1,000                            |
|                    | GSK-3 $\beta$                   | Santa Cruz Biotechnology, Inc.             | sc-377213 | 1:1,000                            |
|                    | ALIX                            | Santa Cruz Biotechnology, Inc.             | sc-53540  | 1:1,000                            |
|                    | Syntenin-1                      | Santa Cruz Biotechnology, Inc.             | sc-100336 | 1:1,000                            |
|                    | $\beta$ -actin                  | Santa Cruz Biotechnology, Inc.             | sc-47778  | 1:1,000                            |
|                    | HSP70                           | Santa Cruz Biotechnology, Inc.             | sc-32239  | 1:1,000                            |
|                    | HSP90                           | Santa Cruz Biotechnology, Inc.             | sc-13119  | 1:1,000                            |
|                    | RelA/p65                        | Santa Cruz Biotechnology, Inc.             | sc-8008   | 1:1,000                            |
|                    | p-ERK                           | Cell Signaling Technology, Inc.            | 9101S     | 1:2,000                            |
|                    | GM130                           | Abcam                                      | Ab52649   | 1:1,000                            |
| Pan-Ras            | MilliporeSigma                  | OP40                                       | 1:1,000   |                                    |
| Secondary antibody | Anti-rabbit IgG-HRP             | Cell Signaling Technology, Inc.            | 7074      | 1:2,000                            |
|                    | Anti-mouse IgG-HRP              | Cell Signaling Technology, Inc.            | 7076      | 1:2,000                            |
|                    | Anti-mouse secondary Alexa 488  | Invitrogen; Thermo Fisher Scientific, Inc. | A-11001   | -                                  |
|                    | Anti-rabbit secondary Alexa 488 | Invitrogen; Thermo Fisher Scientific, Inc. | A-11008   | -                                  |

NFATc1, nuclear factor of activated T-cells 1; CtsK, cathepsin K; LGR4, leucine-rich repeat-containing G-protein coupled receptor 4; SEMA3A, semaphorin 3A; TSG101, tumor susceptibility gene 101; GSK-3 $\beta$ , glycogen synthase kinase 3 $\beta$ ; ALIX, apoptosis-linked gene 2-interacting protein X; HSP, heat shock protein; GM130, Golgi matrix protein 130.

**Table SII.** List of primers used for RT-qPCR for mRNAs.

| <b>Gene</b>     | <b>Forward</b>       | <b>Reverse</b>        |
|-----------------|----------------------|-----------------------|
| <i>ACP5</i>     | ACTTGCGACCATTGTTAGCC | TTCGTTGATGTCGCACAGAG  |
| <i>CtsK</i>     | GACACCCAGTGGGAGCTATG | AGAGGCCTCCAGGTTATGGG  |
| <i>DC-STAMP</i> | TGTTTCCACGAAGCCCTAGC | ACAGAAGAGAGCAGGGCAAC  |
| <i>SEMA3A</i>   | ATCAGTGGGTGCCTTACCAA | GCCAAATGTTTTACTGGGACA |
| <i>MMP9</i>     | TGGGCAAGCAGTACTCTTCC | AACAGGCTGTACCCTTGGTC  |
| <i>GAPDH</i>    | TGAGCAAGAGAGGCCCTATC | AGGCCCTCCTGTTATTATG   |

ACP5, ACP5, acid phosphatase 5, tartrate resistant; DC-STAMP, dendrocyte expressed seven transmembrane protein; SEMA3A, semaphorin 3A; MMP9, matrix metalloproteinase 9.

**Table SIII.** Primer sequences used for RT-qPCR for miRNAs.

| <b>miRNA name</b>      | <b>Forward primer (5' - to -3')</b> |
|------------------------|-------------------------------------|
| <i>hsa-miR-4466</i>    | GGGTGCGGGCCGGCGGGG                  |
| <i>hsa-miR-6088</i>    | AGAGATGAAGCGGGGGGGCG                |
| <i>hsa-miR-4516</i>    | GGGAGAAGGGTCGGGGC                   |
| <i>hsa-miR-4530</i>    | CCCAGCAGGACGGGAGCG                  |
| <i>hsa-miR-6724-5p</i> | CTGGGCCCCGCGGCGGGCGTGGGG            |
| <i>hsa-miR-1915-3p</i> | CCCCAGGGCGACGCGGCGGG                |
| <i>hsa-miR-6821-5p</i> | GTGCGTGGTGGCTCGAGGCGGGG             |
| <i>hsa-miR-4497</i>    | CTCCGGGACGGCTGGGC                   |
| <i>hsa-miR-3665</i>    | AGCAGGTGCGGGGGCGGCG                 |
| <i>hsa-miR-6125</i>    | GCGGAAGGCGGAGCGGCGGA                |
| <i>hsa-miR-1227-5p</i> | GTGGGGCCAGGCGGTGG                   |
| <i>hsa-miR-3196</i>    | CGGGGCGGCAGGGGCCTC                  |
| <i>hsa-miR-4508</i>    | GCGGGGCTGGGCGCGCG                   |
| <i>hsa-miR-6743-5p</i> | AAGGGGCAGGGACGGGTGGCCC              |
| <i>hsa-miR-762</i>     | GGGGCTGGGGCCGGGGCCGAGC              |
| <i>hsa-miR-3138</i>    | TGTGGACAGTGAGGTAGAGGGAGT            |
| <i>hsa-miR-455-3p</i>  | GCAGTCCATGGGCATATACAC               |
| <i>hsa-miR-7704</i>    | CGGGGTCGGCGGCGACGTG                 |
| <i>hsa-miR-4707-5p</i> | GCCCCGGCGCGGGCGGGTTCTGG             |
| <i>hsa-miR-4687-3p</i> | TGGCTGTTGGAGGGGGCAGGC               |
| <i>hsa-miR-6869-5p</i> | GTGAGTAGTGGCGCGGCGGCGG              |
| <i>hsa-miR-6089</i>    | GGAGGCCGGGGTGGGGCGGGGCGG            |
| <i>hsa-miR-378h</i>    | ACTGGACTTGGTGTGTCAGATGG             |
| <i>hsa-miR-6794-5p</i> | CAGGGGGACTGGGGGTGAGC                |
| <i>hsa-miR-6729-5p</i> | TGGGCGAGGGCGGCTGAGCGGC              |
| <i>hsa-miR-3613-5p</i> | TGTTGTACTTTTTTTTTTTGTTC             |
| <i>hsa-miR-3619-5p</i> | TCAGCAGGCAGGCTGGTGCAGC              |
| <i>has-miR-494-3p</i>  | TGAAACATACACGGGAAACCTC              |
| <i>mmu-miR-494-3p</i>  | TGAAACATACACGGGAAACCTC              |
| U6 snRNA               | CGCAAGGATGACACGCAAATTC              |

**Table SIV.** Clinicopathological characteristics of the breast tumor tissues from the patients.

| No. | Age, years | TNM stage | ER (Allred score) | PR (Allred score) | HER2 (+/-) | Ki67 (%) |
|-----|------------|-----------|-------------------|-------------------|------------|----------|
| 1   | 56         | T1N1M0    | 8                 | 4                 | +          | 5        |
| 2   | 58         | T2N0M0    | 0                 | 0                 | +          | 30       |
| 3   | 53         | T2N0M0    | 8                 | 4                 | +          | 10       |
| 4   | 62         | T2N0M0    | 8                 | 8                 | +          | 5        |
| 5   | 85         | T1cN0M0   | 8                 | 8                 | +          | 5        |
| 6   | 52         | T1bN0M0   | 8                 | 5                 | +          | 10       |
| 7   | 64         | T1cN0M0   | 8                 | 6                 | +          | 2        |
| 8   | 51         | T1N0M0    | 0                 | 0                 | +          | 10       |
| 9   | 63         | T2N2M0    | 7                 | 3                 | +          | 2        |
| 10  | 47         | T2N2M0    | 7                 | 8                 | +          | 10       |
| 11  | 60         | T2N0M0    | 8                 | 5                 | +          | 8        |
| 12  | 34         | T2N3cM0   | 0                 | 0                 | +          | 70       |
| 13  | 44         | T2N0M0    | 8                 | 6                 | +          | 15       |
| 14  | 55         | T2N0M0    | 8                 | 0                 | +          | 15       |
| 15  | 58         | T2N0M0    | 0                 | 0                 | +          | 60       |
| 16  | 65         | T2N2M0    | 0                 | 0                 | +          | 10       |
| 17  | 49         | T1N0M0    | 0                 | 0                 | +          | 30       |
| 18  | 74         | T2N0M0    | 0                 | 0                 | +          | 2        |
| 19  | 58         | T1N1M0    | 8                 | 7                 | +          | 15       |
| 20  | 53         | T1cN0M0   | 0                 | 0                 | -          | 3        |
| 21  | 64         | T1cN0M0   | 0                 | 0                 | -          | 1        |
| 22  | 63         | T2N0M0    | 0                 | 0                 | -          | 15       |
| 23  | 65         | T1bN0M0   | 0                 | 0                 | -          | 2        |
| 24  | 71         | T1cNxM0   | 0                 | 0                 | -          | 10       |
| 25  | 54         | T2N0M0    | 0                 | 0                 | -          | 30       |
| 26  | 52         | T1cN1aM0  | 0                 | 0                 | -          | 50       |
| 27  | 61         | T1cN0M0   | 0                 | 0                 | -          | 15       |
| 28  | 59         | T1cN0M0   | 0                 | 0                 | -          | 10       |
| 29  | 82         | T2N0M0    | 0                 | 0                 | -          | 15       |
| 30  | 66         | T2N1aM0   | 0                 | 0                 | -          | 20       |
| 31  | 48         | T1bN0M0   | 0                 | 0                 | -          | 10       |
| 23  | 64         | T2N0M0    | 0                 | 0                 | -          | 3        |
| 33  | 80         | T1cN0M0   | 0                 | 0                 | -          | 2        |
| 34  | 38         | T2N0M0    | 0                 | 0                 | -          | 20       |
